# Supplementary material
Source: PubMed Central journal article supplement (PMC2311331)
Supplement: 0712401105_Supplemental_PDF.pdf [file 0712401105_Supplemental_PDF.pdf]

# Supporting Information

Killilea and Ames 10.1073/pnas.0712401105

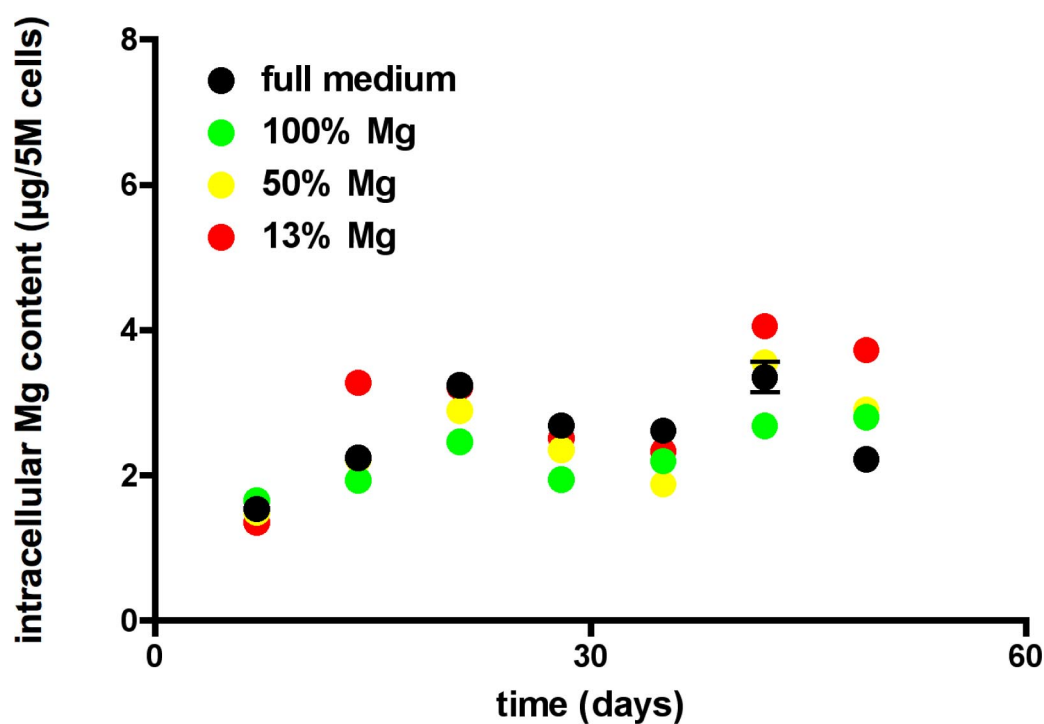

**Fig. S1.** Long-term exposure to magnesium-deficient conditions did not result in reduced intracellular magnesium content in primary IMR-90 cells. Cells were cultured in full medium (black) or magnesium-deficient media replenished to 13% (red), 50% (yellow), or 100% (green) of normal magnesium content in ambient oxygen. Intracellular magnesium content was measured by ICP in seven independent IMR-90 populations from early, mid, and late PD. Representative data shows mean  $\pm$  SD ( $n = 2$  replicate wells) magnesium content normalized to 5 million cells (5M) from a single population that was plotted as a function of PD. Intracellular magnesium levels ranged from 1 to 4  $\mu\text{g}$  per 5M cells; assuming an average volume of 3,000 fL for young IMR-90 cells (1), this yields an intracellular magnesium concentration range of 3–11 mM. This finding is consistent with other reports of normal intracellular magnesium concentrations ranging between 5 and 20 mM for human and other mammalian cell types (2). There was an apparent increase in average total intracellular magnesium levels comparing early to late PD, as seen in a previous study (1). However, no consistent difference in total intracellular magnesium levels over time observed between full and magnesium-deficient conditions. Several other mammalian cell types have also been shown to maintain a normal intracellular magnesium level even when cultured in conditions with very high or very low extracellular magnesium (2, 3). If this is the case, these results suggest that IMR-90 cell populations in magnesium-deficient conditions were able to regulate magnesium transport to meet intracellular demand.

1. Killilea DW, Atamna H, Liao C, Ames BN (2003) Iron accumulation during cellular senescence in human fibroblasts *in vitro*. *Antioxid Redox Signal* 5:507–516.
2. Romani A, Marfella C, Scarpa A (1993) Regulation of magnesium uptake and release in the heart and in isolated ventricular myocytes. *Circ Res* 72:1139–1148.
3. Wolf FI, Torsello A, Fasanella S, Cittadini A (2003) Cell physiology of magnesium. *Mol Aspects Med* 24:11–26.

**Table S1. Long-term exposure to magnesium-deficient conditions did not result in reduced cellular viability in primary IMR-90 cells**

| PDL                | Full medium |       |          | 100% Mg |       |          | 50% Mg |       |          | 13% Mg |       |          | ANOVA |
|--------------------|-------------|-------|----------|---------|-------|----------|--------|-------|----------|--------|-------|----------|-------|
|                    | Mean        | SD    | <i>n</i> | Mean    | SD    | <i>n</i> | Mean   | SD    | <i>n</i> | Mean   | SD    | <i>n</i> |       |
| 20% O <sub>2</sub> |             |       |          |         |       |          |        |       |          |        |       |          |       |
| 24–26              | 100.00      | 21.05 | 4        | 108.15  | 12.97 | 4        | 99.76  | 14.23 | 4        | 96.40  | 26.45 | 2        | NS    |
| 35–37              | 100.00      | 14.84 | 3        | 110.26  | 22.68 | 3        | 113.85 | 11.62 | 3        | 103.59 | 21.00 | 3        | NS    |
| 45–49              | 100.00      | 35.64 | 3        | 115.50  | 10.30 | 3        | 132.40 | 10.07 | 3        | 129.10 | 15.88 | 3        | NS    |
| 47–51              | 100.00      | 26.18 | 3        | 92.30   | 14.40 | 3        | 128.00 | 17.92 | 3        | 115.70 | 12.44 | 3        | NS    |
| 5% O <sub>2</sub>  |             |       |          |         |       |          |        |       |          |        |       |          |       |
| 25–30              | 100.00      | 11.18 | 3        | 119.51  | 9.68  | 3        | 132.11 | 9.47  | 3        | 119.11 | 19.14 | 3        | NS    |
| 58–64              | 100.00      | 3.21  | 3        | 96.44   | 4.30  | 3        | 126.60 | 28.20 | 3        | 108.79 | 13.60 | 3        | NS    |

Cells were cultured in full or magnesium-deficient media repleted to 13%, 50%, or 100% of normal magnesium content. For early toxicity studies, cells were incubated with 0.5 mg/ml 3-(4,5-dimethylthiazol-2-yl)-2,5-diphenyltetrazolium bromide (MTT) for 2–4 h at 37°C. The reaction was terminated and formazan crystals solubilized in 100% DMSO. Relative MTT reduction was measured by absorbance at 590 nm. MTT reduction in three independent IMR-90 populations from early, middle, and late PD maintained in different media conditions and oxygen tensions is indicated. Representative data shows mean ± SD (*n* = 2–4 replicate wells) of MTT reduction capacity normalized to control populations (full medium) as a function of PD. The differences in mean values within each PD group were determined not to be significant (NS; one-way ANOVA, Dunnett's multiple comparison post hoc test). For end-stage toxicity studies, cell suspension were incubated with 0.2% trypan blue in PBS for 5 min and then scored for trypan-blue exclusion by light microscopy. Trypan-blue exclusion paralleled MTT reduction results (data not shown).

**Table S2. Long-term exposure to magnesium-deficient conditions did not result in reduced plating efficiency in primary IMR-90 cells**

| Day | Full medium | 100% Mg | 50% Mg | 13% Mg | ANOVA |
|-----|-------------|---------|--------|--------|-------|
| 1   | 94          | 96      | 97     | 97     | NS    |
| 2   | 93          | 93      | 94     | 92     | NS    |
| 3   | 95          | 97      | 97     | 95     | NS    |

Plating efficiency was determined by daily cell counts over 3 consecutive days for two independent IMR-90 populations maintained under varying media conditions at ambient oxygen tension. Representative data show percent of attached cells from total cells at 48, 72, and 96 h after plating as a function of media condition. The differences in mean values within each PD group were determined not to be significant (NS; one-way ANOVA, Dunnett's multiple comparison post hoc test).
